# Supplementary material for: Machine learning applications on neonatal sepsis treatment: a scoping review
Source: BMC Infect Dis. 2023 Jun 29;23:441. doi: 10.1186/s12879-023-08409-3 (PMC10308703; doi:10.1186/s12879-023-08409-3)
Supplement: Supplementary file 2 — Supplementary Material 2 [file 12879_2023_8409_MOESM2_ESM.xlsx]

## Sheet: Sheet1
Study	Year	Country	Settings/Sample Size	BSI definition	Missing data handling	Machine learning techniques	Most important variables for predicting outcome	Outcome
Auguet et al.	2021	Kenya, Cambodia, UK	NA / NA	NA	Complete case analysis	Bayesian generalised linear model	NA	Antimicrobial resistance in Enterobacterales isolates
Buhimschi et al.	2011	USA	NBSCU / 180	Positive blood culture, laboratory data, symptoms of infection	NA	Bayesian latent-class analysis	NA	Early-onset neonatal sepsis
Cabrera-Quiros et al.	2021	Netherlands	Medical centre / 358	Positive blood culture, signs of infection, intravenous antibiotics	NA	Logistic regressor, naive Bayes, nearest mean classifier	RMSSD, AAR, RespSD, RespIDR	Late-onset sepsis
Chakraborty et al.	2021	UK	Multiple centres / 1,445	Positive blood culture, laboratory data, symptoms of infection	NA	NA	NA	Neonatal sepsis
Gojak et al.	2022	Bosnia, Herzegovina	NA / 1000	NA	NA	Levenberg-Marquardt backpropagation algorithm, ANN	NA	Neonatal sepsis
Gordon et al.	2020	USA	Children’s Hospital / 38	Positive blood culture, prolonged course of antibiotics	NA	Decision tree, random forest	Proline, N6-acetyllysine, taurine, cytidine, 2-ydroxyglutarate, ornithine, thymine, glutamate, α- ketoglutarate	Bacterial meningitis
Huang et al.	2021	USA	Children’s Hospital / 2,357	Positive blood culture, antibiotics	NA	SVM, KNN, logistic regression, random forest, XGBoost	Neutrophil fluorescence intensity, neutrophil cell size, neutrophil dispersion width, gestational age, monocyte fluorescence intensity	Neonatal sepsis
Mani et al.	2014	USA	Children’s Hospital / 299	Positive blood culture, symptoms of infection	Last observation carry forward (LOCF)	SVM, naïve Bayes classifier, KNN, decision trees, CRT, random forest, logistic regression, lazy Bayesian rules	NA	Late-onset sepsis
Masino et al.	2019	USA	NICU / 618	Positive blood culture, antibiotics	Mean imputation	Logistic regression, naïve Bayes, SVM with a radial basis function KNN, Gaussian process, random forest, AdaBoost, and gradient boosting	NA	Neonatal sepsis
Metsvaht et al.	2009	Estonia	2 NICU / 283	Laboratory data, symptoms of infection	Surrogate splitting	Multiple logistic regression, CRT	Birthweight, C−reactive protein, white blood count, gestational age, platelet count, vasoactive treatment, blood glucose	Treatment failure in early onset neonatal sepsis
Oonsivilai et al.	2018	Cambodia	Children's Hospital / NA‡	NA	Treated as negative	Logistic regression, decision trees, random forests, boosted decision trees, linear SVM, polynomial SVMs, radial SVMs, KNN	Time from admission to blood culture, patient age, hospital versus community-acquired infection, age-adjusted weight score	Antimicrobial resistance
Ramgopal et al.	2020	USA	26 ED / 1,470	Positive blood culture	Complete case analysis	Logistic regression, random forest, SVM, ANN	Urinalysis	Serious bacterial infection
Sokou et al.	2022	Greece	NICU / 291	Positive blood culture, laboratory data, signs of infection	Complete case analysis	Multivariable model through 10-fold cross-validation LASSO logit regression	Considerable change in skin colour	Neonatal sepsis
Stocker et al.	2022	Netherlands, Canada, Czechia, Switzerland	17 centres / 685	Positive blood culture, antibiotics	Complete case analysis	Random forest	C−reactive protein, white blood count	Early-onset neonatal sepsis
Tabaie et al.	2021	USA	NA / 2,749	Positive blood culture	NA	Bidirectional LSTM	Temperature	Serious infection
Tabaie et al.	2021	USA	NA / 2,749	Positive blood culture, new antibiotic course	NA	XGBoost and ElasticNet	Max - diastolic blood pressure	Serious infection
Zhang et al.	2021	China	Children’s Hospital / 70	Positive blood culture, laboratory data, non-specific or focal signs and symptoms	NA	Linear, LASSO, XGBoost	Serum creatinine, cerebrospinal fluid pyuric acid	Neonatal sepsis with meningoencephalitis
Zhang et al.	2018	China	NA / 63	NA	NA	Random forest	Rapoport–Luebering glycolytic shunt, phospholipase C signaling	Neonatal sepsis
